# Supplementary material for: A General Comprehensive Evaluation Method for Cross-Scale Precipitation Forecasts
Source: Copernicus journal article supplement (doi:10.5194/egusphere-2023-2613), 2023-12-18
Supplement: Supplementary file 1 [file egusphere-2023-2613-supplement.pdf]

# Readme for GCEM Data and Code

## 1 Data

### 1.1 Observed Precipitation Data

#### 1.1.1 /DataSoftware/01Observed\_precipitation\_data/2019071612

Hourly precipitation from 00:00 to 12:00 UTC on July 16, 2019 for Case 1

*surfr01h.nc*

*surfr02h.nc*

*surfr03h.nc*

*surfr04h.nc*

*surfr05h.nc*

*surfr06h.nc*

*surfr07h.nc*

*surfr08h.nc*

*surfr09h.nc*

*surfr10h.nc*

*surfr11h.nc*

*surfr12h.nc*

#### 1.1.2 /DataSoftware/01Observed\_precipitation\_data/2020061312

Hourly precipitation from 00:00 to 12:00 UTC on June 13,2020 for Case 2

*surfr01h.nc*

*surfr02h.nc*

*surfr03h.nc*

*surfr04h.nc*

*surfr05h.nc*

*surfr06h.nc*

*surfr07h.nc*

*surfr08h.nc*

*surfr09h.nc*

*surfr10h.nc*

*surfr11h.nc*

*surfr12h.nc*

### 1.2 Forecasted Precipitation Data

#### 1.2.1 /DataSoftware/02Forecasted\_precipitation\_data/2019071612

Data for Case 1 during 00:00-12:00 UTC on July 16, 2019

*WRF3.2019071600000.nc* (initial field at 12:00 UTC on July 16, 2019)

*WRF3.2019071600012.nc* (12-hour accumulated precipitation during 00:00–12:00 UTC on July 16, 2019)

#### 1.2.2 /DataSoftware/02Forecasted\_precipitation\_data/2020061312

Data for Case 2 during 00:00-12:00 UTC on June 13,2020

*WRF3.2020061300000.nc* (initial field at 12:00 UTC on June 13,2020)

*WRF3.2020061300012.nc* (12-hour accumulated precipitation during 00:00–12:00 UTC on June 13,2020)

## 2 Code and Configuration Files

### 2.1 GCEM of grid precipitation forecast data (/DataSoftware/03Software\_Configuration\_Results\_of\_GCEM)

*pastonc6hd2.f90* Main program, reads observed and forecasted precipitation data, performs GCEM verification, and outputs result files.

*module\_skinput.f90* Subprogram, module for reading one or more observed precipitation grid file

*module\_ybinput.f90* Subprogram, module for reading the start (or end) forecasted precipitation grid file

*mod\_uxpasid2.f90* Subprogram, module for used to perform GCEM verification on forecasted data

*module\_outnc.f90* Subprogram, module for outputting the verification results in netCDF file format

*compilePAS10mmd2.sh* Used to compile source files to generate executable file under Linux

*r12hfile.txt* Configuration file, used to specify the latitude and longitude range for data source and verification

*pastonc6hd2.exe* Executable file

### 2.2 TS of grid precipitation forecast data (/DataSoftware/04Software\_Configuration\_Results\_of\_TS-Score)

*tmain01.f90* Main program, reads observed and forecasted precipitation data, performs TS verification, and outputs result files.

*module\_skinput.f90* Subprogram, module for reading one or more observed precipitation grid file

*module\_ybinput.f90* Subprogram, module for reading the start (or end) forecasted precipitation grid file

*module\_uxtsiTure.f90* Subprogram, module for used to perform TS verification on forecasted data

*compileTS.sh* Used to compile source files to generate executable file under Linux

*r12hfile.txt* Configuration file, used to specify the latitude and longitude range for data source and verification

*tmain01.exe* Executable file

### 2.3 PAS mini-program (/DataSoftware/05Software\_of\_PAS)

*pas10ux.f90* Main program, used to perform PAS verification on single point precipitation forecast

*mod\_uxpasid2.f90* Subprogram, Module for PAS of single point forecast

*compilePAS10ux.sh* Used to compile source files to generate executable file under Linux

*pas10ux.exe* Executable file

## 3 Output files

### 3.1 GCEM verification results (/DataSoftware/03Software\_Configuration\_Results\_of\_GCEM/Results\_GCEM)

*rainverd2019071612012.nc* Result file in netCDF format

*rainverd2019071612012.nc.txt* Result explanation file in netCDF format

*rainverd2020061312012.nc* Result file in netCDF format

*rainverd2020061312012.nc.txt* Result explanation file in netCDF format

### 3.2 TS verification results (/DataSoftware/04Software\_Configuration\_Results\_of\_TS-Score/Results\_TS)

*ts12h2019071612.txt* TS result file in text format

*ts12h2020061312.txt* TS result file in text format

## 4 Compiling Environment

The verification program runs in a UNIX environment and requires the intel compiler (v2017) and the netCDF (v4.6.1) support library

UNIX Environment Settings

```
# .bashrc
```

```
module load intel/intel-compiler-2017.5.239
```

```
module load intelmpi/2019.6.154
```

```
export F90=ifort
export NETCDF=/public/software/mathlib/netcdf/4.6.1_intel-2017_mpi-2017_hdf5-1.8.20-intel2017
export NETCDF_LIB=$NETCDF/lib
export NETCDF_INC=$NETCDF/include
export PATH=$NETCDF/bin:$PATH
export LD_LIBRARY_PATH=$NETCDF/lib:$LD_LIBRARY_PATH
```

## 5 Compiling and Running Steps

### 5.1 The steps for case 1 during 00:00–12:00 UTC on July 16, 2019

1. Creating an installation and running sub-directory  
mkdir p2019
2. Copying data sources, code files and configuration files to this directory
3. Running in this directory  
./compilePAS10mmd2.sh    Compile to generate executable file (pastonc6hd2.exe)  
./compileTS.sh    Compile to generate executable file (tsmain01.exe)
4. Modifying the configuration file (r12hfile.txt)  
Mainly modifying the data source path for lines 4, 19, and 23
5. Run the executable files  
./pastonc6hd2.exe > outnc12hd22019071612.txt  
Creating the GCEM result file (rainverd2019071612012.nc), procedure file (outnc12hd22019071612.txt)  
./tsmain01.exe > ts12h2019071612.txt  
Creating the TS result and procedure file (ts12h2019071612.txt)

### 5.2 The steps for case 2 during 00:00–12:00 UTC on June 13, 2020

1. Creating an installation and running sub-directory  
mkdir p2020
2. Copying data sources, code files and configuration files to this directory
3. Running in this directory  
./compilePAS10mmd2.sh    Compile to generate executable file (pastonc6hd2.exe)  
./compileTS.sh    Compile to generate executable file (tsmain01.exe)
4. Modifying the configuration file (r12hfile.txt)  
Mainly modifying the data source path for lines 4, 19, and 23
5. Run the executable files  
./pastonc6hd2.exe > outnc12hd22020061312.txt  
Creating the GCEM result file (rainverd2020061312012.nc), procedure file (outnc12hd22020061312.txt)  
./tsmain01.exe > ts12h2020061312.txt  
Creating the TS result and procedure file (ts12h2019071612.txt)

### 5.3 The steps for PAS mini-program

1. Creating an installation and running sub-directory  
mkdir pas
2. Copying code files and configuration files to this directory
3. Running in this directory  
./compilePAS10ux.sh    Compile to generate executable file (pastonc6hd2.exe)

4. linking the executable file as pas

In -sf pas10ux.exe pas

5. Running the PAS mini-program

for example: `./pas 15 20`

Parameter 1: 15 represents observed precipitation

Parameter 2: 20 represents forecasted precipitation

Output: 0.895 1

The following instructions for specific usage:

`pas rainsk rainyb [level]`

#### **Input parameters**

Parameter 1 (*rainsk*): observed precipitation (mm)

Parameter 2 (*rainyb*): forecasted precipitation (mm)

Parameter 3 (*level*): Specifying magnitude (Optional, default to  $\geq 0.1$ mm)

#### **Onput parameters**

Parameter 1 (*ipas*): Pas score value (0-1) or correct value of no precipitation forecast (1);  
-999.000 represents default.

Parameter 2 (*iTure*):

0 indicates that the rating is correct for a no precipitation forecast;

1 indicates a PAS score of  $\geq$  the specified magnitude;

9 indicates that it is not in the no precipitation test, nor is it the verification the specified

magnitude;

-999 indicates default.

## **6 Module code main interface description**

### **6.1 skinput()**

subroutine skinput(skfile,skfilenum,rain,gridskx,gridsky,longitude,latitude)

integer,intent(in) :: skfilenum

character(len=200),dimension(skfilenum),intent(in) :: skfile

real,dimension(:,:),allocatable,intent(out) :: rain

integer,intent(out) :: gridskx,gridsky

usage: Read a set of observed precipitation data files and output grid accumulated precipitation

skfile, A set of filenames that are arrays of strings (input)

skfilenum, Number of files (input)

rain, Accumulated precipitation, rain(nx,ny) (output)

gridskx, grid points, nx (output)

gridsky, grid points, ny (output)

gridlon, Longitude array, gridlon(nx) (output)

gridlat, Latitude array, gridlat(ny) (output)

### **6.2 ybinput()**

```

subroutine ybinput(ybfile,apcp,gridybx,gridyby,gridyblon,gridyblat)
  character(len=200),intent(in) :: ybfile
  real,dimension(:,:),allocatable,intent(out) :: apcp,gridyblat,gridyblon
  integer,intent(out) :: gridybx,gridyby

```

usage: Read a set of forecasted precipitation data files and output forecast grid precipitation

```

ybfile,   Forecast file (input)
apcp,     forecasted precipitation array, apcp(nx, ny) (output)
gridybx,  Number of grid points for forecast data, nx (output)
gridyby,  Number of grid points for forecast data, ny (output)
gridyblon, Longitude of forecast data, gridyblon(nx, ny) (output)
gridyblat, Latitude of forecast data, gridyblat(nx, ny) (output)

```

### 6.3 uxpasid2()

```

subroutine uxpasid2(ui,xi,level,pas,iTure,iclass,ieps)
  real,intent(in) :: ui,xi,level
  real,intent(out) :: pas,ieps
  integer,intent(out) :: iTure,iclass

```

usage: Read in the observed and forecasted precipitation, and output the PAS score result

```

rainsk,   Observed precipitation (input)
rainyb,   Forecasted precipitation (input)
level,    Specifying magnitude (input)
ipas,     Pas score value (0-1) or correct value of no precipitation forecast (1)
iTure,    0 indicates that the rating is correct for a no precipitation forecast;
          1 indicates a PAS score of  $\geq$  the specified magnitude;
          9 indicates that it is not in the no precipitation test, nor is it the verification the specified
magnitude;
          -999 indicates default.
iclass,   0 indicates the category (no precipitation forecast is correct)
          1 indicates the category of insufficient precipitation forecast (observation  $u < 10\text{mm}$ )
          2 indicates the category of excessive(or equal) precipitation forecast(observation  $u < 10\text{mm}$ )
          3 indicates the category of insufficient precipitation forecast (observation  $u \geq 10\text{mm}$ )
          4 indicates the category of excessive(or equal) precipitation forecast(observation  $u \geq$ 
10mm)
          -999 indicates default.
ieps,     0 indicates the forecasted and observed precipitation are equal
          <0 indicates insufficient precipitation forecast
          >0 indicates excessive precipitation forecast
          -999 indicates default.

```

### 6.4 outpasnc()

```

subroutine outpasnc(title,vtime,vhour,gridncx,gridncy,gridnclon,gridnclat,rainncsk,rainncyb,&
  pasc,pas01,pas10,pas25,pas50, pas2p5,pas5,pas15, pascnc,pasnc01,pasnc10,&

```

```

        pasnc25,pasnc50,pasnc2p5,pasnc5,pasnc15,ipsnc,epsnc,iepsnc,ips,eps,ieps)
character(len=10),intent(in) :: vtime,title
integer,intent(in) :: vhour,gridncx,gridncy
character(len=10) :: chour
real,dimension(gridncx),intent(in) :: gridnclon
real,dimension(gridncy),intent(in) :: gridnclat
real,dimension(gridncx,gridncy),intent(in) :: rainncsk,rainncyb,pascnc,pasnc01
real,dimension(gridncx,gridncy),intent(in) :: pasnc10,pasnc25,pasnc50,ipsnc,epsnc,iepsnc
real,dimension(gridncx,gridncy),intent(in) :: pasnc2p5,pasnc5,pasnc15
real,intent(in) :: pasc,pas01,pas10,pas25,pas50,ips,eps,ieps,pas2p5,pas5,pas15

```

usage: Output data to a netCDF format file

|            |                                          |
|------------|------------------------------------------|
| title,     | File name tag (d)                        |
| vtime,     | time string (yyyymmddhh, eg. 2019071612) |
| vhour,     | Accumulated precipitation duration (12)  |
| gridncx,   | x grid points (240)                      |
| gridncy,   | y grid points (200)                      |
| gridnclon, | x grid points longitude array            |
| gridnclat, | y grid points latitude array             |
| rainncsk,  | Observed precipitation                   |
| rainncyb,  | Forecasted precipitation                 |
| pasc,      | PASC                                     |
| pas01,     | $\geq 0.1$ mm PAS                        |
| pas10,     | $\geq 10$ mm PAS                         |
| pas25,     | $\geq 25$ mm PAS                         |
| pas50,     | $\geq 50$ mm PAS                         |
| pas2p5,    | $\geq 2.5$ mm PAS                        |
| pas5,      | $\geq 5$ mm PAS                          |
| pas15,     | $\geq 15$ mm PAS                         |
| pascnc,    | PASC array                               |
| pasnc01,   | $\geq 0.1$ mm PAS array                  |
| pasnc10,   | $\geq 10$ mm PAS array                   |
| pasnc25,   | $\geq 25$ mm PAS array                   |
| pasnc50,   | $\geq 50$ mm PAS array                   |
| pasnc2p5,  | $\geq 2.5$ mm PAS array                  |
| pasnc5,    | $\geq 5$ mm PAS array                    |
| pasnc15,   | $\geq 15$ mm PAS array                   |
| ipsnc,     | IPS array                                |
| epsnc,     | EPS array                                |
| iepsnc,    | IEPS array                               |
| ips,       | IPS                                      |
| eps,       | EPS                                      |
| ieps,      | IEPS                                     |
